# Supplementary material
Source: MDPI journal article supplement (https://www.mdpi.com/2073-4352/7/9/275)
Supplement: s1 [file s1]

# Supplementary Materials

## The Effects of a Mixed Precipitant on the Morphology and Electrochemical Performance of $\text{LiNi}_{0.5}\text{Mn}_{1.5}\text{O}_4$ Cathode Materials

Yang Shu, Wenchao Yan, Haisong Wang, Jicheng Jiang, Deye Sun, Xiaodi Ma, Yongcheng Jin

### Thermalgravimetric Analysis

As Figure S1 shows, the weight loss of the mixture of  $\text{Ni}_{0.25}\text{Mn}_{0.75}\text{CO}_3$  precursors and  $\text{Li}_2\text{CO}_3$  can be divided into three periods: firstly, weight loss with 4.09% below 350 °C is related to water loss; secondly, the main weight loss with 28.71% between 350 and 500 °C attributes to the decomposition of carbonate and the formation of the spinel LNMO; lastly, slight weight loss with 3.71% over 500 °C is ascribed to the oxygen loss and lithium evaporation, which implies that there will be no violent chemical reactions occurring over 500 °C. Therefore, we preheated the samples at 550 °C and annealed them at 800 °C.

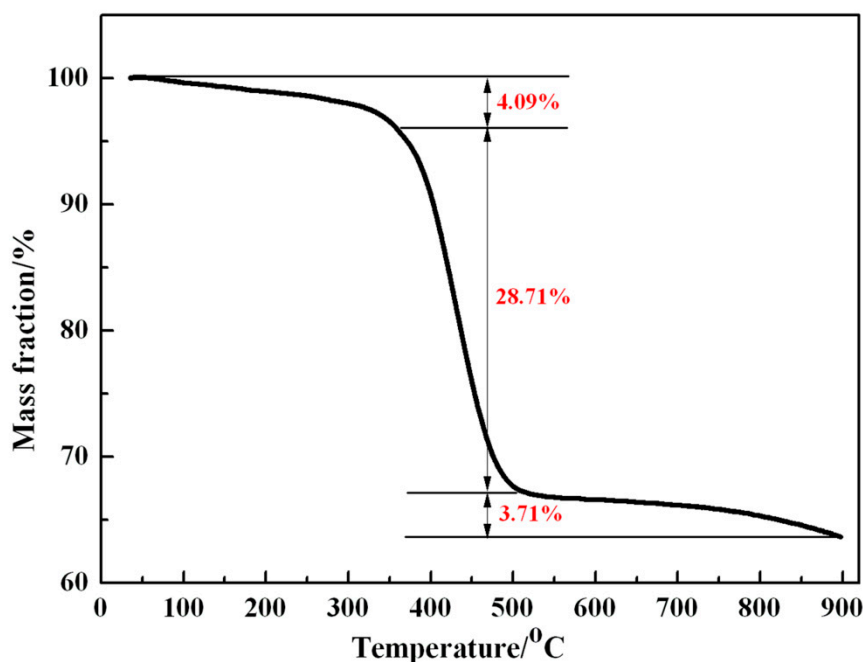

**Figure S1.** TG curve of heating the mixture of precursor and lithium source for mixed precipitants of  $(\text{NH}_4)_2\text{CO}_3$  and  $\text{Na}_2\text{CO}_3$  with a molar ratio of 1:2.

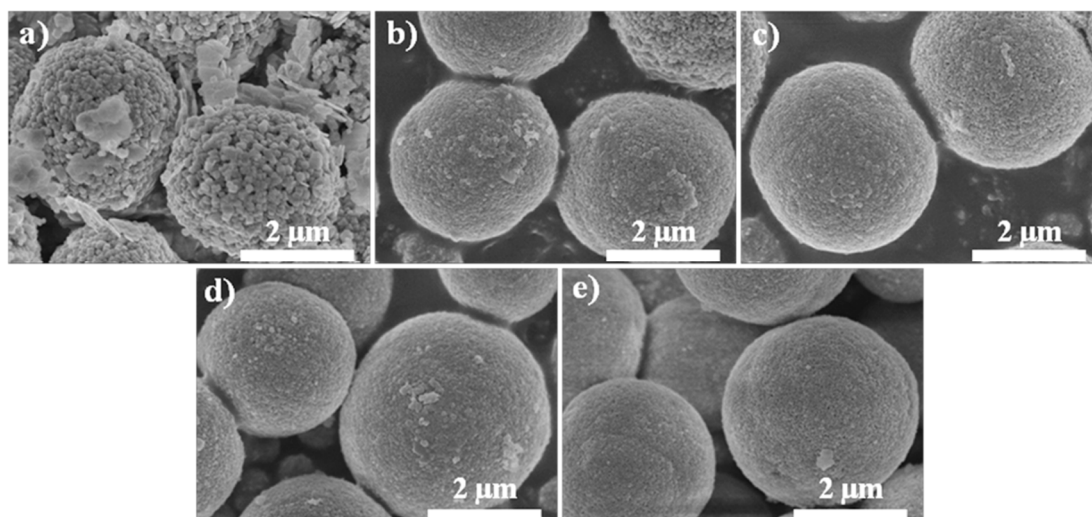

**Figure S2.** High-resolution SEM images of spherical precursors prepared by mixed precipitants of  $(\text{NH}_4)_2\text{CO}_3$  and  $\text{Na}_2\text{CO}_3$  with different molar ratios: (a) 0:1; (b) 1:2; (c) 1:1; (d) 2:1; (e) 1:0.

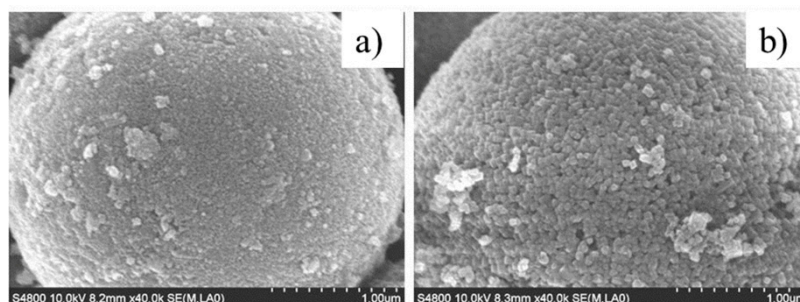

**Figure S3.** High-resolution SEM images of spherical precursors before (a) and after (b) hydrothermal treatment prepared by mixed precipitants of  $(\text{NH}_4)_2\text{CO}_3$  and  $\text{Na}_2\text{CO}_3$  with a molar ratio of 2:1.
